# Supplementary material
Source: Springer Nature journal article supplement (https://www.springermedizin.de/resource/supplementary/12889_2008_1235_MOESM1_ESM.pdf/9502752)

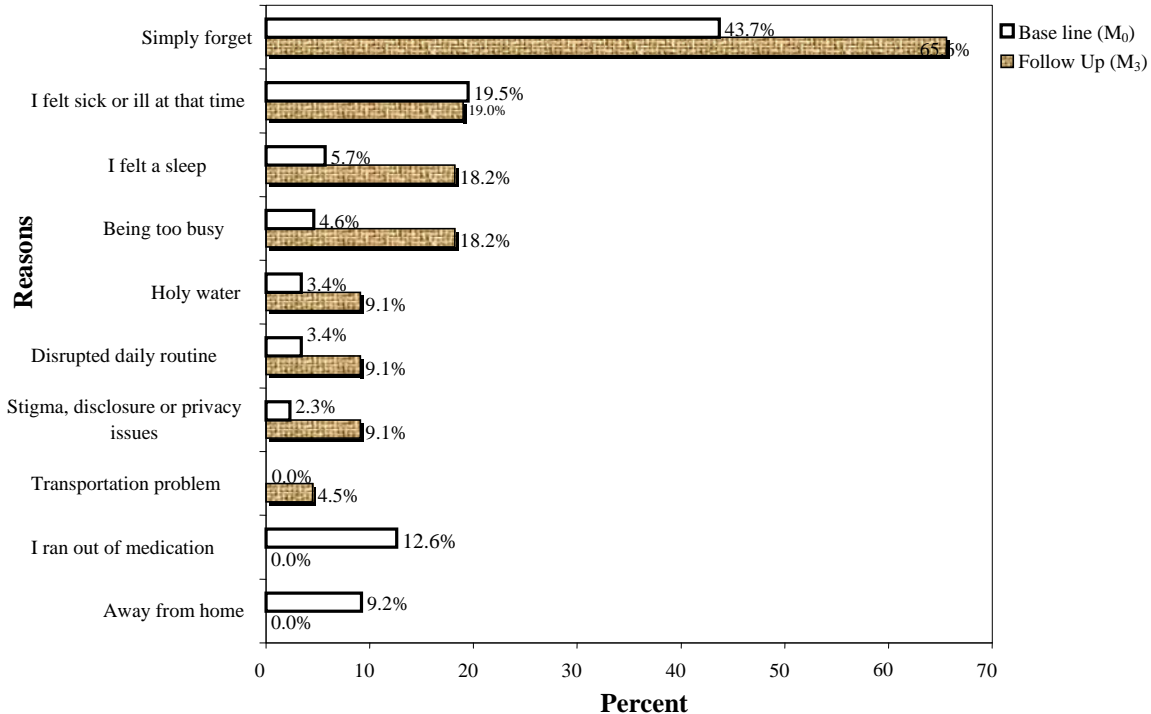

Supplement: MOESM1 [file 9502752]
